# Supplementary material
Source: publisher site journal article supplement (https://www.dovepress.com/article/431231)
Supplement: Supplementary file 1 [file get_supplementary_file.php]

**Supplementary materials
Supplementary Table 1.** ICD-10-CM codes for ST-elevation myocardial infarction and non-ST-elevation myocardial infarction.

**Supplementary Table 2.** Keywords used for screening the diagnoses in the discharge summary.

**Supplementary Table 3.** Procedure codes used for screening potential cases of acute myocardial infarction.

**Supplementary Table 4.** Diagnostic criteria of ST-elevation myocardial infarction and non-ST-elevation myocardial infarction based on medical record review.

**Supplementary Table 5.** Performance of algorithms for all patients (n = 197,490) in the development cohort.

**Supplementary Table 1.** ICD-10-CM codes for ST-elevation myocardial infarction and non-ST-elevation myocardial infarction

| ICD-10-CM | Description |
| --- | --- |
| **ST-segment elevation myocardial infarction** | |
| I21.0x | ST-elevation myocardial infarction of anterior wall |
| I21.1x | ST-elevation myocardial infarction of inferior wall |
| I21.2x | ST-elevation myocardial infarction of other sites |
| I21.3 | ST-elevation myocardial infarction of unspecified site |
| I21.9 | Acute myocardial infarction, unspecified |
| **Non-ST-segment elevation myocardial infarction** | |
| I21.4 | Non-ST-elevation myocardial infarction |

**Abbreviations:** ICD-10-CM, International Classification of Diseases, Tenth Revision, Clinical Modification.

**Supplementary Table 2.** Keywords used for screening the diagnoses in the discharge summary

| Acute myocardial infarction |
| --- |
| ST-elevation myocardial infarction |
| Non-ST-elevation myocardial infarction |
| Myocardial infarct* |
| **exclude:** old myocardial infarct* |

**Supplementary Table 3.** Procedure codes used for screening potential cases of acute myocardial infarction

| **Procedure codes** | **Description** |
| --- | --- |
| 18022B | Coronary angiography |
| 18020B | Cardiac catheterization - one side |
| 18021B | Cardiac catheterization - both sides |
| 33076B | Percutaneous coronary dilatation - one vessel |
| 33077B | Percutaneous coronary dilatation - two vessels |
| 33078B | Percutaneous coronary dilatation - three vessels |

| **Supplementary Table 4**. Diagnostic criteria of ST-elevation myocardial infarction and non-ST-elevation myocardial infarction based on medical record review. |
| --- |
| **Diagnostic criteria for STEMI** |
| The patient’s cardiac troponin value needed to exceed the 99th percentile upper reference limit (female > 0.016 ng/mL; mela > 0.034 ng/mL), and this value had to change by over 20% in serial examination. |
| AND new ischemic ECG changes with ST-segment elevation. |
| AND the presence of a coronary thrombus or occlusion of the coronary artery |
| **Diagnostic criteria for NSTEMI** |
| The patient’s cardiac troponin value needed to exceed the 99th percentile upper reference limit (female > 0.016 ng/mL; mela > 0.034 ng/mL), and this value had to change by over 20% in serial examination. |
| AND new ischemic ECG changes with no ST-segment elevation or with a medical record of signs or symptoms of clinical myocardial ischemia (chest pain, dyspnea, shortness of breath, etc.). |
| AND the presence of a coronary thrombus or occlusion of the coronary artery |
| **Exclusion criteria** |
| Serial high-sensitivity cardiac troponin-I level less than sex-specific 99th percentile (female ≤ 0.016 ng/mL; male ≤ 0.034 ng/mL) |
| No evidence of a coronary thrombus or occlusion detected on angiography. |

**Abbreviations:** ECG: electrocardiogram, STEMI, ST-elevation myocardial infarction, NSTEMI: non-ST-elevation myocardial infarction

**Supplementary Table 5.** Performance of algorithms for all patients (n = 197,490) in the development cohort

| **Diagnosis** | **Algorithm** | **Sensitivity (%) (95% CI)** | **Specificity (%) (95% CI)** | | **PPV (%) (95% CI)** | | **NPV (%) (95% CI)** | | **Kappa (95% CI)** | |
| --- | --- | --- | --- | --- | --- | --- | --- | --- | --- | --- |
| **STEMI** | **A** | 88.3 (85.8–90.4) | 100.0 (100.0–100.0) | | 92.6 (90.5–94.4) | | 100.0 (99.9–100.0) | | 0.903 (0.888–0.919) | |
| **B** | 93.6 (91.7–95.2) | 100.0 (99.9–100.0) | | 89.4 (87.1–91.4) | | 100.0 (100.0–100.0) | | **0.914 (0.900–0.928)** | |
| **C** | 95.7 (94.0–97.0) | 99.9 (99.9–99.9) | | 86.6 (84.2–88.7) | | 100.0 (100.0–100.0) | | 0.909 (0.894–0.923) | |
| **D** | 84.4 (81.7–86.9) | 100.0 (100.0–100.0) | | 93.8 (91.8–95.5) | | 99.9 (99.9–99.9) | | 0.888 (0.872–0.905) | |
| **E** | 87.8 (85.3–89.9) | 100.0 (100.0–100.0) | | 92.7 (90.6–94.4) | | 99.9 (99.9–100.0) | | 0.901 (0.886–0.917) | |
| **F** | 89.2 (86.9–91.3) | 100.0 (100.0–100.0) | | 91.6 (89.5–93.5) | | 100.0 (99.9–100.0) | | 0.904 (0.889–0.919) | |
| **G** | 82.8 (80.0–85.4) | 100.0 (100.0–100.0) | | 94.0 (92.0–95.6) | | 99.9 (99.9–99.9) | | 0.880 (0.863–0.897) | |
| **H** | 85.4 (82.8–87.8) | 100.0 (100.0–100.0) | | 93.3 (91.2–95.0) | | 99.9 (99.9–100.0) | | 0.891 (0.875–0.908) | |
| **I** | 86.5 (84.0–88.8) | 100.0 (100.0–100.0) | | 92.8 (90.8–94.6) | | 99.9 (99.9–100.0) | | 0.895 (0.879–0.911) | |
| **NSTEMI** | **A** | 66.5 (64.2–68.7) | 100.0 (100.0–100.0) | | 98.9 (98.1–99.4) | | 99.7 (99.7–99.7) | | 0.793 (0.777–0.810) | |
| **B** | 77.5 (75.4–79.5) | 100.0 (100.0–100.0) | | 97.5 (96.5–98.2) | | 99.8 (99.8–99.8) | | 0.862 (0.849–0.875) | |
| **C** | 82.6 (80.7–84.4) | 100.0 (100.0–100.0) | | 96.5 (95.3–97.4) | | 99.8 (99.8–99.9) | | **0.889 (0.878–0.901)** | |
| **D** | 56.9 (54.5–59.3) | 100.0 (100.0–100.0) | | 99.3 (98.5–99.7) | | 99.6 (99.6–99.7) | | 0.722 (0.703–0.741) | |
| **E** | 63.0 (60.6–65.3) | 100.0 (100.0–100.0) | | 98.9 (98.1–99.4) | | 99.7 (99.7–99.7) | | 0.768 (0.751–0.786) | |
| **F** | 65.8 (63.5–68.1) | 100.0 (100.0–100.0) | | 98.6 (97.7–99.2) | | 99.7 (99.7–99.7) | | 0.788 (0.771–0.805) | |
| **G** | 50.5 (48.1–52.9) | 100.0 (100.0–100.0) | | 99.2 (98.3–99.7) | | 99.6 (99.5–99.6) | | 0.667 (0.646–0.688) | |
| **H** | 55.5 (53.0–57.8) | 100.0 (100.0–100.0) | | 99.1 (98.2–99.6) | | 99.6 (99.6–99.6) | | 0.709 (0.690–0.729) | |
| **I** | 57.9 (55.5–60.2) | 100.0 (100.0–100.0) | | 98.8 (98.0–99.4) | | 99.6 (99.6–99.7) | | 0.728 (0.709–0.747) | |
| **AMI** | **A** | 75.3 (73.6–77.0) | 100.0 (100.0–100.0) | | 98.7 (98.1–99.2) | | 99.7 (99.7–99.7) | | 0.853 (0.841–0.864) | |
| **B** | 85.0 (83.5–86.4) | 100.0 (100.0–100.0) | | 97.1 (96.3–97.7) | | 99.8 (99.8–99.8) | | 0.905 (0.896–0.914) | |
| **C** | 89.4 (88.2–90.6) | 99.9 (99.9–100.0) | | 95.6 (94.7–96.4) | | 99.9 (99.8–99.9) | | **0.923 (0.915–0.931)** | |
| **D** | 67.4 (65.5–69.2) | 100.0 (100.0–100.0) | | 99.2 (98.7–99.6) | | 99.6 (99.6–99.6) | | 0.800 (0.787–0.814) | |
| **E** | 72.7 (71.0–74.5) | 100.0 (100.0–100.0) | | 98.8 (98.2–99.3) | | 99.7 (99.6–99.7) | | 0.836 (0.824–0.848) | |
| **F** | 75.3 (73.5–76.9) | 100.0 (100.0–100.0) | | 98.3 (97.6–98.8) | | 99.7 (99.7–99.7) | | 0.851 (0.839–0.862) | |
| **G** | 62.4 (60.5–64.3) | 100.0 (100.0–100.0) | | 99.2 (98.6–99.6) | | 99.5 (99.5–99.5) | | 0.764 (0.749–0.778) | |
| **H** | 66.8 (64.9–68.6) | 100.0 (100.0–100.0) | | 99.1 (98.5–99.5) | | 99.6 (99.5–99.6) | | 0.796 (0.782–0.809) | |
| **I** | 68.9 (67.1–70.7) | 100.0 (100.0–100.0) | | 98.9 (98.3–99.3) | | 99.6 (99.6–99.6) | | 0.810 (0.797–0.823) | |
| **Notes:** The top kappa value is in bold face type. | | | |  | |  | |  | |  | |
| **Abbreviations:** AMI, acute myocardial infarction; CI, confidence interval; PPV, positive predictive value; NPV, negative predictive value, STEMI, ST-elevation myocardial infarction, NSTEMI: non-ST-elevation myocardial infarction | | | | | | | | | | | |
